# Supplementary material
Source: HighWire-hosted journal article supplement (https://bmjopen.bmj.com/content/12/7/e061346)
Supplement: inline-supplementary-material-1 [file inline-supplementary-material-1.pdf]

**Appendix Table 1. Additional study sample characteristics, children aged 12-23 months in rural areas, Malawi DHS 2015-16.**

|                                          | Unweighted N | Weighted % |
|------------------------------------------|--------------|------------|
| <i>Total</i>                             | 2740         | 100.0%     |
| <b>Individual child indicators</b>       |              |            |
| Sex of child                             |              |            |
| Male                                     | 1362         | 49.1%      |
| Female                                   | 1378         | 50.9%      |
| Birth order                              |              |            |
| 1 <sup>st</sup>                          | 673          | 25.3%      |
| 2 <sup>nd</sup>                          | 522          | 18.9%      |
| 3 <sup>rd</sup>                          | 453          | 16.1%      |
| 4 <sup>th</sup>                          | 375          | 13.2%      |
| 5 <sup>th</sup> or more                  | 717          | 26.5%      |
| <b>Maternal/household indicators</b>     |              |            |
| <i>Mother's age (Weighted Mean / SD)</i> | 27.2         | 6.6        |
| Mother's education                       |              |            |
| None                                     | 331          | 13.2%      |
| Primary                                  | 1963         | 71.7%      |
| Secondary or higher                      | 446          | 15.2%      |
| Household wealth index quintile*         |              |            |
| Poorest                                  | 769          | 29.9%      |
| Poorer                                   | 678          | 24.8%      |
| Middle                                   | 601          | 22.3%      |
| Richer                                   | 464          | 16.1%      |
| Richest                                  | 228          | 7.0%       |
| Region of Malawi                         |              |            |
| Northern                                 | 508          | 12.0%      |
| Central                                  | 959          | 42.0%      |
| Southern                                 | 1273         | 46.0%      |

**Appendix Table 2. Unadjusted and adjusted comparisons of immunization rates among children in rural areas aged 12-23 months by presence of vaccine-providing facility in 8km radius, Malawi 2013-14.**

|                                            | Unadjusted rates                       |                                     |         | Unadjusted logistic regression |             | Adjusted logistic regression |             |
|--------------------------------------------|----------------------------------------|-------------------------------------|---------|--------------------------------|-------------|------------------------------|-------------|
|                                            | No vaccine-providing facility proximal | Vaccine-providing facility proximal | p-value | OR <sup>1</sup>                | 95% CI      | AOR <sup>1,2</sup>           | 95% CI      |
| <i>Specific immunization dose coverage</i> |                                        |                                     |         |                                |             |                              |             |
| BCG                                        | 96.4%                                  | 97.8%                               | 0.22    | 1.59                           | [0.71,3.58] | 1.54                         | [0.70,3.39] |
| Rotavirus 2 doses                          | 87.0%                                  | 91.9%                               | 0.02    | 1.66*                          | [1.03,2.65] | 1.53                         | [0.95,2.45] |
| OPV 3 doses                                | 80.4%                                  | 81.3%                               | 0.75    | 1.14                           | [0.78,1.67] | 1.14                         | [0.80,1.63] |
| Pentavalent 3 doses                        | 90.7%                                  | 93.3%                               | 0.25    | 1.55                           | [0.95,2.83] | 1.44                         | [0.81,2.56] |
| Pneumococcal 3 doses                       | 87.2%                                  | 89.4%                               | 0.54    | 1.33                           | [0.67,2.64] | 1.20                         | [0.64,2.26] |
| Measles 1+ dose                            | 86.0%                                  | 92.0%                               | 0.03    | 2.04*                          | [1.16,3.60] | 1.88*                        | [1.06,3.33] |
| <i>Coverage of group of immunizations</i>  |                                        |                                     |         |                                |             |                              |             |
| All basic vaccines <sup>3</sup>            | 69.1%                                  | 76.6%                               | 0.08    | 1.57*                          | [1.02,2.43] | 1.54*                        | [1.02,2.32] |
| All recommended vaccines <sup>4</sup>      | 36.7%                                  | 53.2%                               | <0.001  | 1.89**                         | [1.28,2.81] | 1.97***                      | [1.35,2.89] |
| <i>Negative immunization outcomes</i>      |                                        |                                     |         |                                |             |                              |             |
| Pentavalent zero dose                      | 5.4%                                   | 2.3%                                | 0.03    | 0.37*                          | [0.16,0.88] | 0.38*                        | [0.18,0.82] |
| Pentavalent dropout <sup>5</sup>           | 4.1%                                   | 4.6%                                | 0.75    | 1.02                           | [0.51,2.01] | 1.10                         | [0.54,2.24] |

<sup>1</sup>Reference is children not proximal to a vaccine-providing facility<sup>2</sup>Models also control for household wealth, mother's education, mother's age, child sex, child birth order, region of country<sup>3</sup>Defined as BCG 1 dose, OPV 3 doses, DTP/HBV/Hib (pentavalent) 3 doses, measles 1 dose<sup>4</sup>Basic + OPV birth dose + rotavirus 2 doses + PCV13 3 doses<sup>5</sup>Dropout denominator is children with at least 1 dose of pentavalent

\* p&lt;0.05, \*\* p&lt;0.01, \*\*\* p&lt;0.001

**Appendix Table 3a. Logistic regression models of individual-level vaccination among children 12-23 months living in rural areas who are within 5km of a facility providing vaccination. Only facility-characteristic coefficients reported.<sup>1</sup>**

|                                                                        | <i>Specific immunization dose coverage</i> |              |                  |              |              |             |                    |              |                     |              |                 |             |
|------------------------------------------------------------------------|--------------------------------------------|--------------|------------------|--------------|--------------|-------------|--------------------|--------------|---------------------|--------------|-----------------|-------------|
|                                                                        | BCG                                        |              | Rotavirus 2 dose |              | Polio 3 dose |             | Pentavalent 3 dose |              | Pneumococcal 3 dose |              | Measles 1+ dose |             |
|                                                                        | AOR                                        | 95% CI       | AOR              | 95% CI       | AOR          | 95% CI      | AOR                | 95% CI       | AOR                 | 95% CI       | AOR             | 95% CI      |
| <i>Facility type offering vaccination [highest available if &gt;1]</i> |                                            |              |                  |              |              |             |                    |              |                     |              |                 |             |
| Hospital                                                               | <i>Ref</i>                                 | <i>Ref</i>   | <i>Ref</i>       | <i>Ref</i>   | <i>Ref</i>   | <i>Ref</i>  | <i>Ref</i>         | <i>Ref</i>   | <i>Ref</i>          | <i>Ref</i>   | <i>Ref</i>      | <i>Ref</i>  |
| Health centre                                                          | 0.92                                       | [0.34,2.49]  | 1.03             | [0.54,1.95]  | 1.07         | [0.72,1.58] | 0.89               | [0.48,1.64]  | 0.69                | [0.40,1.20]  | 1.17            | [0.51,2.64] |
| Health post/clinic/dispensary                                          | 1.88                                       | [0.42,8.48]  | 0.93             | [0.38,2.28]  | 1.94         | [0.97,3.86] | 0.84               | [0.33,2.16]  | 0.87                | [0.34,2.24]  | 0.79            | [0.27,2.34] |
| <i>Managing authority of facility/ies offering vaccination</i>         |                                            |              |                  |              |              |             |                    |              |                     |              |                 |             |
| Government                                                             |                                            |              |                  |              |              |             |                    |              |                     |              |                 |             |
| No                                                                     | <i>Ref</i>                                 | <i>Ref</i>   | <i>Ref</i>       | <i>Ref</i>   | <i>Ref</i>   | <i>Ref</i>  | <i>Ref</i>         | <i>Ref</i>   | <i>Ref</i>          | <i>Ref</i>   | <i>Ref</i>      | <i>Ref</i>  |
| Yes                                                                    | 2.06                                       | [0.51,8.36]  | 1.65             | [0.89,3.07]  | 2.32**       | [1.37,3.93] | 1.76               | [0.91,3.42]  | 1.18                | [0.64,2.15]  | 1.34            | [0.70,2.55] |
| CHAM                                                                   |                                            |              |                  |              |              |             |                    |              |                     |              |                 |             |
| No                                                                     | <i>Ref</i>                                 | <i>Ref</i>   | <i>Ref</i>       | <i>Ref</i>   | <i>Ref</i>   | <i>Ref</i>  | <i>Ref</i>         | <i>Ref</i>   | <i>Ref</i>          | <i>Ref</i>   | <i>Ref</i>      | <i>Ref</i>  |
| Yes                                                                    | 1.71                                       | [0.44,6.67]  | 1.54             | [0.80,2.97]  | 2.47***      | [1.46,4.18] | 2.04*              | [1.06,3.93]  | 1.05                | [0.60,1.86]  | 1.39            | [0.63,3.07] |
| Private for-profit                                                     |                                            |              |                  |              |              |             |                    |              |                     |              |                 |             |
| No                                                                     | <i>Ref</i>                                 | <i>Ref</i>   | <i>Ref</i>       | <i>Ref</i>   | <i>Ref</i>   | <i>Ref</i>  | <i>Ref</i>         | <i>Ref</i>   | <i>Ref</i>          | <i>Ref</i>   | <i>Ref</i>      | <i>Ref</i>  |
| Yes                                                                    | 2.85                                       | [0.31,26.02] | 9.83*            | [1.20,80.47] | 0.82         | [0.38,1.79] | 5.36               | [0.95,30.14] | 1.96                | [0.33,11.49] | 1.57            | [0.32,7.73] |
| NGO                                                                    |                                            |              |                  |              |              |             |                    |              |                     |              |                 |             |
| No                                                                     | <i>Ref</i>                                 | <i>Ref</i>   | <i>Ref</i>       | <i>Ref</i>   | <i>Ref</i>   | <i>Ref</i>  | <i>Ref</i>         | <i>Ref</i>   | <i>Ref</i>          | <i>Ref</i>   | <i>Ref</i>      | <i>Ref</i>  |
| Yes                                                                    | 0.53                                       | [0.13,2.18]  | 1.42             | [0.42,4.81]  | 0.57         | [0.26,1.28] | 2.14               | [0.54,8.44]  | 0.76                | [0.27,2.14]  | 1.59            | [0.46,5.48] |

<sup>1</sup>Models also control for household wealth, education, mother's age, child sex, child birth order, region of country

\* p&lt;0.05, \*\* p&lt;0.01, \*\*\* p&lt;0.001

**Appendix Table 3b. Logistic regression models of individual-level vaccination among children 12-23 months living in rural areas who are within 5km of a facility providing vaccination. Only facility-characteristic coefficients reported.<sup>1</sup>**

|                                                                        | <i>Coverage of group of immunizations</i> |             |                                             |             | <i>Negative immunization outcomes</i> |             |                            |             |
|------------------------------------------------------------------------|-------------------------------------------|-------------|---------------------------------------------|-------------|---------------------------------------|-------------|----------------------------|-------------|
|                                                                        | <b>All basic vaccines<sup>2</sup></b>     |             | <b>All recommended vaccines<sup>3</sup></b> |             | <b>Pentavalent 0 dose</b>             |             | <b>Pentavalent dropout</b> |             |
|                                                                        | AOR                                       | 95% CI      | AOR                                         | 95% CI      | AOR                                   | 95% CI      | AOR                        | 95% CI      |
| <i>Facility type offering vaccination [highest available if &gt;1]</i> |                                           |             |                                             |             |                                       |             |                            |             |
| Hospital                                                               | <i>Ref</i>                                | <i>Ref</i>  | <i>Ref</i>                                  | <i>Ref</i>  | <i>Ref</i>                            | <i>Ref</i>  | <i>Ref</i>                 | <i>Ref</i>  |
| Health centre                                                          | 1.11                                      | [0.75,1.66] | 0.79                                        | [0.55,1.14] | 1.46                                  | [0.42,5.12] | 0.95                       | [0.49,1.86] |
| Health post/clinic/dispensary                                          | 1.45                                      | [0.75,2.81] | 0.93                                        | [0.56,1.54] | 0.20                                  | [0.03,1.28] | 1.53                       | [0.57,4.09] |
| <i>Managing authority of facility/ies offering vaccination</i>         |                                           |             |                                             |             |                                       |             |                            |             |
| Government                                                             |                                           |             |                                             |             |                                       |             |                            |             |
| No                                                                     | <i>Ref</i>                                | <i>Ref</i>  | <i>Ref</i>                                  | <i>Ref</i>  | <i>Ref</i>                            | <i>Ref</i>  | <i>Ref</i>                 | <i>Ref</i>  |
| Yes                                                                    | 1.82*                                     | [1.15,2.88] | 1.94**                                      | [1.24,3.03] | 0.08***                               | [0.02,0.33] | 0.97                       | [0.44,2.11] |
| CHAM                                                                   |                                           |             |                                             |             |                                       |             |                            |             |
| No                                                                     | <i>Ref</i>                                | <i>Ref</i>  | <i>Ref</i>                                  | <i>Ref</i>  | <i>Ref</i>                            | <i>Ref</i>  | <i>Ref</i>                 | <i>Ref</i>  |
| Yes                                                                    | 2.29***                                   | [1.44,3.63] | 1.33                                        | [0.86,2.07] | 0.11**                                | [0.02,0.50] | 0.64                       | [0.31,1.32] |
| Private for-profit                                                     |                                           |             |                                             |             |                                       |             |                            |             |
| No                                                                     | <i>Ref</i>                                | <i>Ref</i>  | <i>Ref</i>                                  | <i>Ref</i>  | --                                    | --          | <i>Ref</i>                 | <i>Ref</i>  |
| Yes                                                                    | 0.84                                      | [0.39,1.78] | 1.04                                        | [0.48,2.25] | --                                    | --          | 0.26                       | [0.04,1.54] |
| NGO                                                                    |                                           |             |                                             |             |                                       |             |                            |             |
| No                                                                     | <i>Ref</i>                                | <i>Ref</i>  | <i>Ref</i>                                  | <i>Ref</i>  | --                                    | --          | <i>Ref</i>                 | <i>Ref</i>  |
| Yes                                                                    | 0.60                                      | [0.28,1.28] | 0.62                                        | [0.35,1.10] | --                                    | --          | 0.60                       | [0.15,2.32] |

<sup>1</sup>Models also control for household wealth, education, mother's age, child sex, child birth order, region of country<sup>2</sup>Defined as BCG 1 dose, OPV 3 dose, DTP/HBV/Hib (pentavalent) 3 dose, measles 1 dose<sup>3</sup>Basic + OPV birth dose + rotavirus 2 doses + PCV13 3 doses

\* p&lt;0.05, \*\* p&lt;0.01, \*\*\* p&lt;0.001
